# Supplementary material for: Electron coupled FeS2/MoS2 heterostructure for efficient electrocatalytic ammonia synthesis under ambient conditions
Source: Royal Society of Chemistry journal article supplement (doi:10.1039/d2dt01467j), 2022-01-01
Supplement: d2dt01467j1.pdf [file d2dt01467j1.pdf]

## Supplementary Information

### Efficient electrocatalytic ammonia synthesis with FeS<sub>2</sub> coupled MoS<sub>2</sub> heterostructure under ambition conditions

Bo Wang<sup>a</sup>, Chao Yan<sup>a</sup>, Guangqing Xu<sup>a,b</sup>, Xia Shu<sup>a,b</sup>, Jun Lv<sup>a,b\*</sup>, Jiewu Cui<sup>a,b</sup>, Dongbo  
Yu<sup>a,b</sup>, Zhiyong Bao<sup>a,b</sup>, Yucheng Wu<sup>a,b\*</sup>

a. School of Materials Science and Engineering, Hefei University of Technology, Hefei,  
230009, PR China

b. Key Laboratory of Advanced Functional Materials and Devices of Anhui Province,  
Hefei, 230009, PR China

---

\* Corresponding author. Key Laboratory of Advanced Functional Materials and  
Devices of Anhui Province, Hefei University of Technology, Hefei, 230009, PR China.

E-mail addresses: lvjun117@126.com (J. Lv), ycwu@hfut.edu.cn (Y. C. Wu).

## Experimental

### Synthesis of FeS<sub>2</sub>/MoS<sub>2</sub>

To synthesize the FeS<sub>2</sub>/MoS<sub>2</sub> (Fe: Mo= 1: 1) sample, one should follow these steps: Firstly, 241.9 mg of Na<sub>2</sub>MoO<sub>4</sub>·H<sub>2</sub>O, 175.4 mg of FeCl<sub>3</sub>, 2878 mg of H<sub>4</sub>SiO<sub>4</sub>(W<sub>3</sub>O<sub>9</sub>)<sub>4</sub>, and 450.8 mg of CH<sub>3</sub>CSNH<sub>2</sub> were dissolved in 45 mL DI water to prepare the precursor solution, keep stirring the mixture solution to obtain a homogenous solution. Secondly, the solution was transferred into a 60 mL stainless steel autoclave for hydrothermal reaction which was performed at 200 °C for 24 h, and then cool down naturally. Finally, the FeS<sub>2</sub>/MoS<sub>2</sub> powders were collected by the centrifugal process, washed with DI water and ethanol several times, then dried for later use. While for the preparation of FeS<sub>2</sub>/MoS<sub>2</sub> (Fe: Mo= 1: 2) sample, only the amount of FeCl<sub>3</sub> is replaced with 87.7 mg. For FeS<sub>2</sub>/MoS<sub>2</sub> (Fe: Mo= 2: 1) sample, only the amount of FeCl<sub>3</sub> is replaced with 350.9 mg. For MoS<sub>2</sub> sample, the precursor remains unchanged except that FeCl<sub>3</sub> is not included.

### Electrochemical measurement

Electrochemical measurements were performed on a CHI660D electrochemical analyzer (Chenhua Instrument, Inc.) in an H-type cell with Nafion 117 membrane. 0.1 M Na<sub>2</sub>SO<sub>4</sub> aqueous solution was adopted as the electrolyte. A platinum foil (10mm\*10 mm), Ag/AgCl (saturated KCl) and Carbon paper (10mm\*10 mm) deposited with electrocatalysts were employed as the counter electrode, the reference electrode and the working electrode, respectively. In this work, the electrode potential (Ag/AgCl) is converted to the reversible hydrogen electrode (RHE) according to the following formula:

$$V(\text{RHE}) = V(\text{Ag/AgCl}) + 0.197 \text{ V} + 0.059 \cdot \text{pH} \quad (1)$$

To well prepare the working electrode, the following steps are suggested: 5 mg of

catalyst, 470  $\mu\text{L}$  of  $\text{C}_3\text{H}_8\text{O}$  (IPA) and 30  $\mu\text{L}$  of Nafion solution (5 wt%) were added together. The mixture was suffered from the ultrasound process until a uniform solution was obtained. Then, 10  $\mu\text{L}$  of the slurry was dropped onto the carbon paper (CP) electrode and dried naturally. LSV measurement was recorded from 0 V vs. Ag/AgCl to -1 V vs. Ag/AgCl with a sweep rate of 10 mV/s. EIS measurement was performed at -0.3 V in the range of 0.1–100 kHz.

### Determination of $\text{NH}_3$

The general indophenol blue method was employed for the detection of  $\text{NH}_3$  concentration<sup>1</sup>. 50  $\mu\text{L}$  of the oxidizing solution containing NaClO ( $\text{pCl} = 4\text{--}4.9$ ) and NaOH (0.75 M), 50  $\mu\text{L}$  of catalyst solution containing 1wt%  $\text{Na}_2[\text{Fe}(\text{CN})_5\text{NO}] \cdot 2\text{H}_2\text{O}$ , and 500  $\mu\text{L}$  of coloring solution containing 0.4 M  $\text{C}_7\text{H}_6\text{O}_3$  and 0.4 M NaOH solution was added into 4 mL reacted electrolyte in turn. After full-color rendering, the absorbance of electrolytes was recorded at  $\lambda = 697$  nm. Besides, a series of standard  $\text{NH}_4\text{Cl}$  solutions were used to calibrate the concentration–absorbance curves and the fitting curve is  $y = 0.243x + 0.054$ ,  $R^2 = 0.999$  (Fig. S5).

$\text{NH}_3$  yield rate is calculated by:

$$\text{NH}_3 \text{ yield rate} = (C_{\text{NH}_4\text{Cl}} \times V) / (t \times A) \quad (2)$$

Faradaic efficiency is calculated by:

$$\text{Faradaic efficiency} = (3F \times C_{\text{NH}_4\text{Cl}} \times V) / Q \quad (3)$$

where  $C_{\text{NH}_4\text{Cl}}$  is the measured concentration of  $\text{NH}_3$ ,  $V$  is the electrolyte volume,  $t$  is the potential applied time,  $A$  is the surface area of the working electrode,  $F$  is the Faraday constant and  $Q$  is the quantity of total charge during NRR.

### Determination of $\text{N}_2\text{H}_4$

The Watt and Chrisp method was employed to detect the possible  $\text{N}_2\text{H}_4$  in the electrolyte<sup>2</sup>. Firstly, prepare the color reagent: mixing 5.99 g of p- $\text{C}_9\text{H}_{11}\text{NO}$ , 30 mL of HCl and 300 mL of  $\text{C}_2\text{H}_5\text{OH}$  together. 5 mL color reagent was added into 5 mL reacted electrolyte. After full-color rendering, the absorbance of electrolytes was recorded at  $\lambda = 457$  nm by spectrophotometer. A series of standard  $\text{N}_2\text{H}_4$  solutions were used to calibrate the concentration–absorbance curves and the fitting curve is  $y = 5.654x +$

0.0246,  $R^2 = 0.9997$  (Fig. S7).

### **Determination of $\text{NO}_3^-$**

Firstly, 0.1 mL of 1.0 M HCl was added into 5 mL sample solutions. Then, after standing for 5 min, the absorbance of electrolytes was measured by spectrophotometer at a wavelength range from 190 to 300 nm. A series of standard  $\text{NO}_3^-$  solutions were used to calibrate the concentration–absorbance curves (0.1, 0.2, 0.5, 1.0, 1.5, 2.0, 2.5, 3.0, 4.0 and 5.0  $\mu\text{g mL}^{-1}$   $\text{LiNO}_3$  standard solutions) and the fitting curve is  $y = 0.0571x + 0.0054$ ,  $R^2 = 0.999$ , which is recorded with the absorbance value difference at 220 nm and 275 nm as y axis and the concentration of  $\text{NO}_3^-$  as x axis. (Fig. S8).

### **Determination of $\text{NO}_2^-$**

The Griess-Ilosvay reaction was employed to detect the possible  $\text{NO}_2^-$  in the electrolyte. Firstly, prepare the color reagent A and B respectively: Reagent A: 0.5 g of sulfanilamide was dissolved in 50 mL solution consisting of 2.0 M HCl; Reagent B: 50 mg of N-(1-Naphthyl) ethylenediamine dihydrochloride was dissolved in 50 mL of DI water. Secondly, 0.1 mL reagent A was added into 5 mL sample solutions, and keep shanking and standing the sample solution for 10 min. Then 0.1 mL of reagent B was added and the mixed solution was shaken up and stand for 30 min. Finally, after full-color rendering, the absorbance of electrolytes was measured by spectrophotometer at a wavelength range from 400 to 700 nm. A series of standard  $\text{NO}_2^-$  solutions were used to calibrate the concentration–absorbance curves (10, 20, 30, 40, 50, 60, 80 and 100  $\mu\text{g L}^{-1}$ ) and the fitting curve is  $y = 0.0011x + 0.0019$ ,  $R^2 = 0.9985$ , which is recorded with the absorbance value difference at 540 nm and 650 nm as y axis and the concentration of  $\text{NO}_2^-$  as x axis. (Fig. S9).

### **Characterization**

X-ray diffractometer (X'Pert PRO MPD) was employed to characterize the phase structure of samples with Cu  $\text{K}\alpha$  radiation ( $\lambda = 1.5406 \text{ \AA}$ ). A photoelectron spectrometer (Thermo/ESCALAB250Xi) was adopted to analyze the elemental composition of samples with Al  $\text{K}\alpha$  radiation (1486.60 eV) as the excitation source. The morphologies and structure of samples were investigated by SEM (SU8020) and

TEM (JEM-2100F) measurements. UV-visible absorption spectroscopy was measured on a UV 1800 spectrophotometer.

### Computational details

Spin-polarized DFT calculations were performed using the Vienna ab initio simulation package (VASP)<sup>3, 4</sup>. The generalized gradient approximation proposed by Perdew, Burke, and Ernzerhof (GGA-PBE) is selected for the exchange-correlation potential<sup>5</sup>. The pseudo-potential was described by the projector-augmented-wave (PAW) method<sup>6</sup>. The geometry optimization is performed until the Hellmann–Feynman force on each atom is smaller than  $0.02 \text{ eV} \cdot \text{\AA}^{-1}$ . The energy criterion is set to  $10^{-7} \text{ eV}$  in iterative solution of the Kohn-Sham equation. A  $0.04 \text{ } 2\pi/\text{\AA}$  K-mesh resolution was applied for the geometry optimization. A higher K-mesh resolution was used for the calculation of density of states. A plane-wave kinetic-energy cutoff of 450 eV was applied. GGA+U method was used for the evaluation of DOS.  $U_{\text{eff}} = U - J = 2.5 \text{ eV}$  and  $J = 1.0 \text{ eV}$  were set for Fe 3d orbitals<sup>7</sup>. The heterojunction was constructed from  $\text{FeS}_2(111)$  plane and  $\text{MoS}_2(001)$  surface.

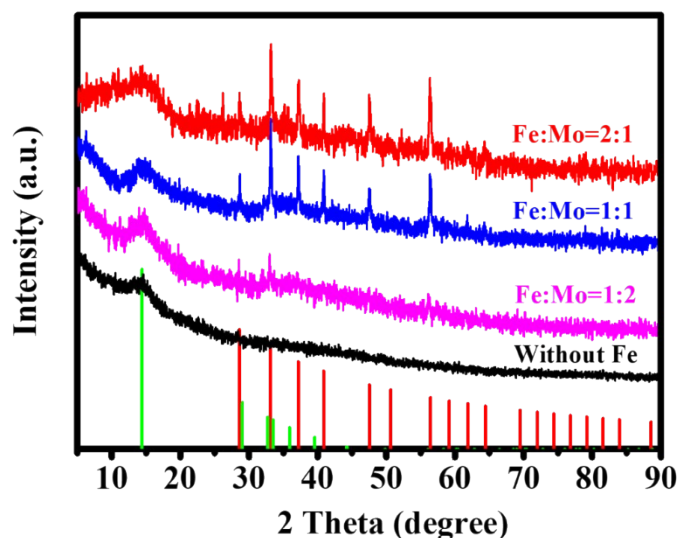

Figure S1. The XRD patterns of  $\text{FeS}_2/\text{MoS}_2$  powders with different mole ratios (Fe:Mo)

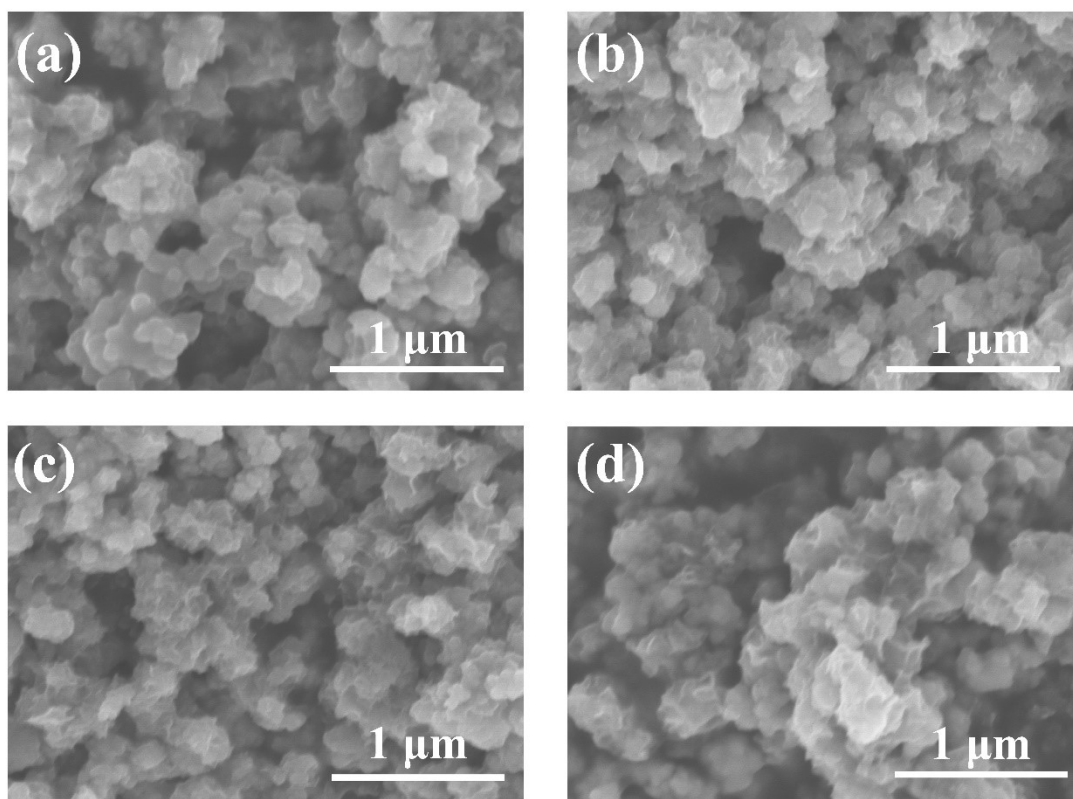

Figure S2. SEM images of different samples, (a) MoS<sub>2</sub>, FeS<sub>2</sub>/MoS<sub>2</sub> samples (b) Fe: Mo= (1:2), (c) Fe: Mo= (1:1), (d) Fe: Mo= (2:1)

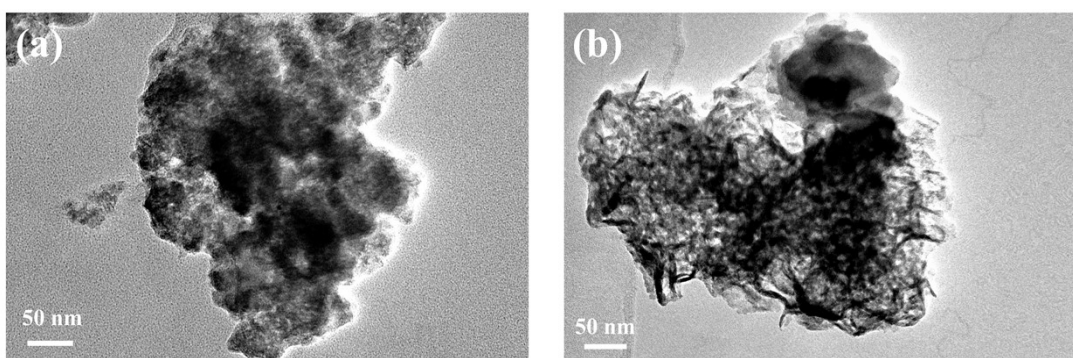

Figure S3. TEM images of different samples, (a) MoS<sub>2</sub>, (b) FeS<sub>2</sub>/MoS<sub>2</sub>(1:1)

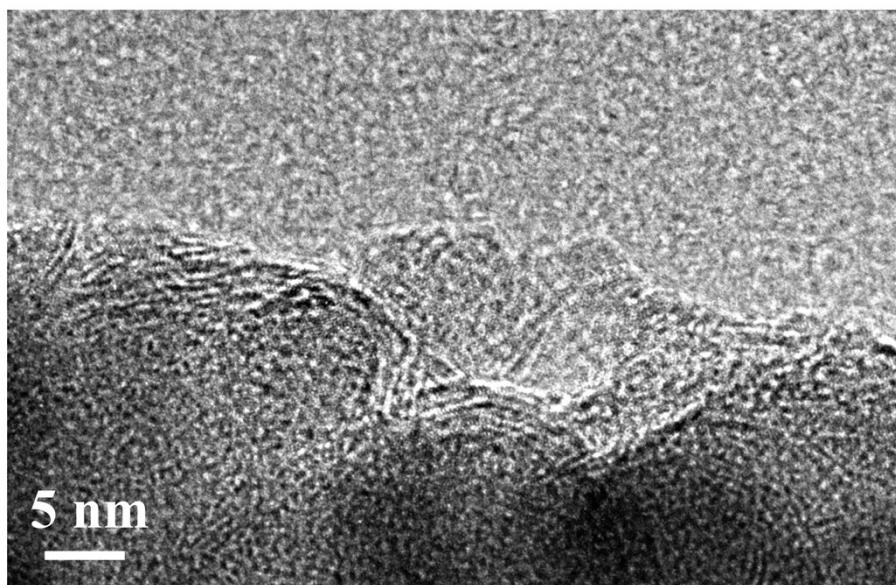

Figure S4. HRTEM image of as-fabricated MoS<sub>2</sub>

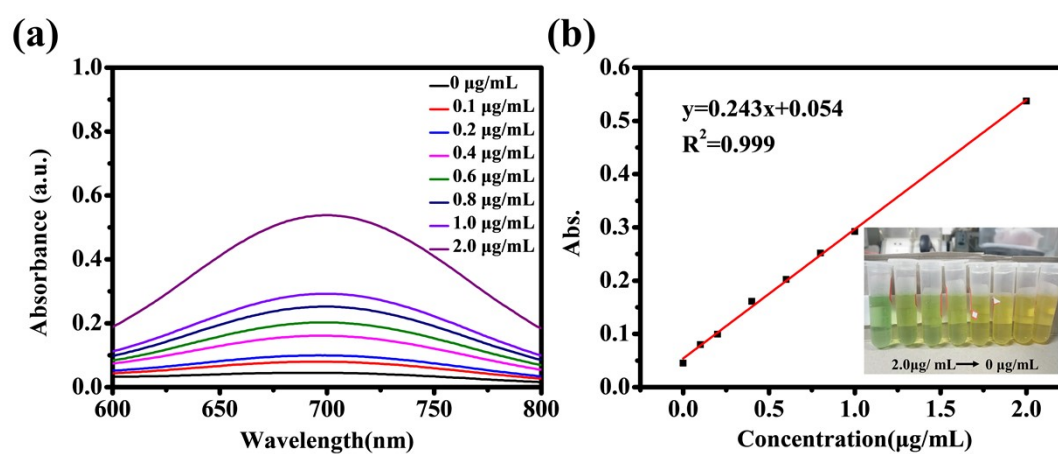

Figure S5. (a) The absorbance of a series of standard solutions for NH<sub>3</sub>, (b) the corresponding fitting curve

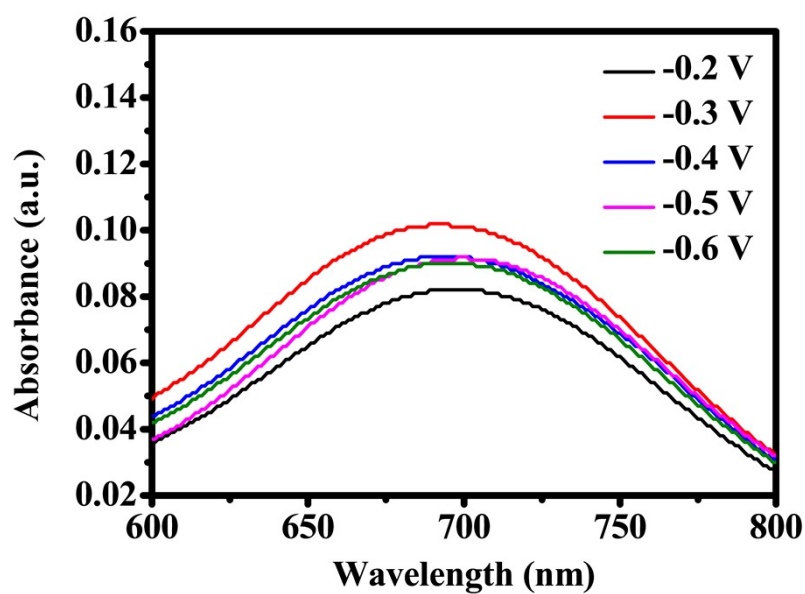

Figure S6. UV-vis absorption spectra of the electrolytes under different potentials

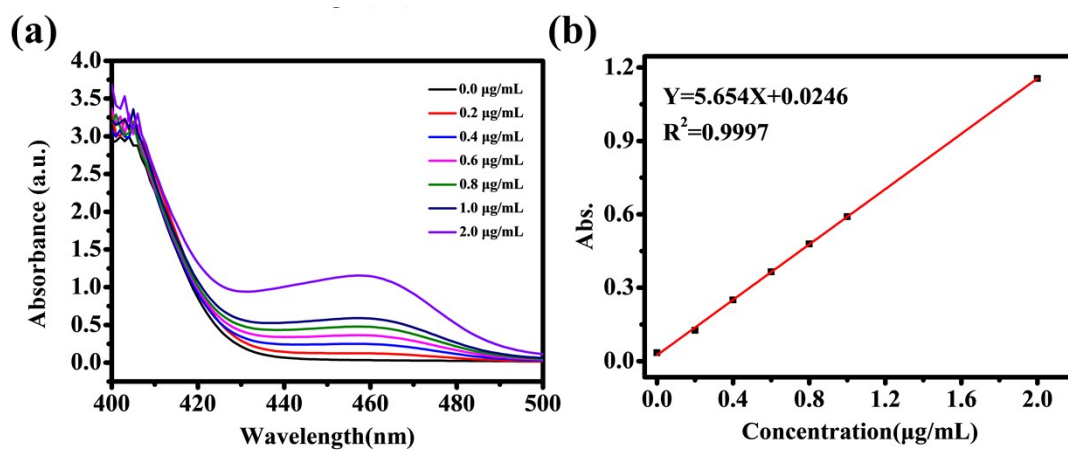

Figure S7. (a) The absorbance of a series of standard solutions for  $N_2H_4$ , (b) the corresponding fitting curve



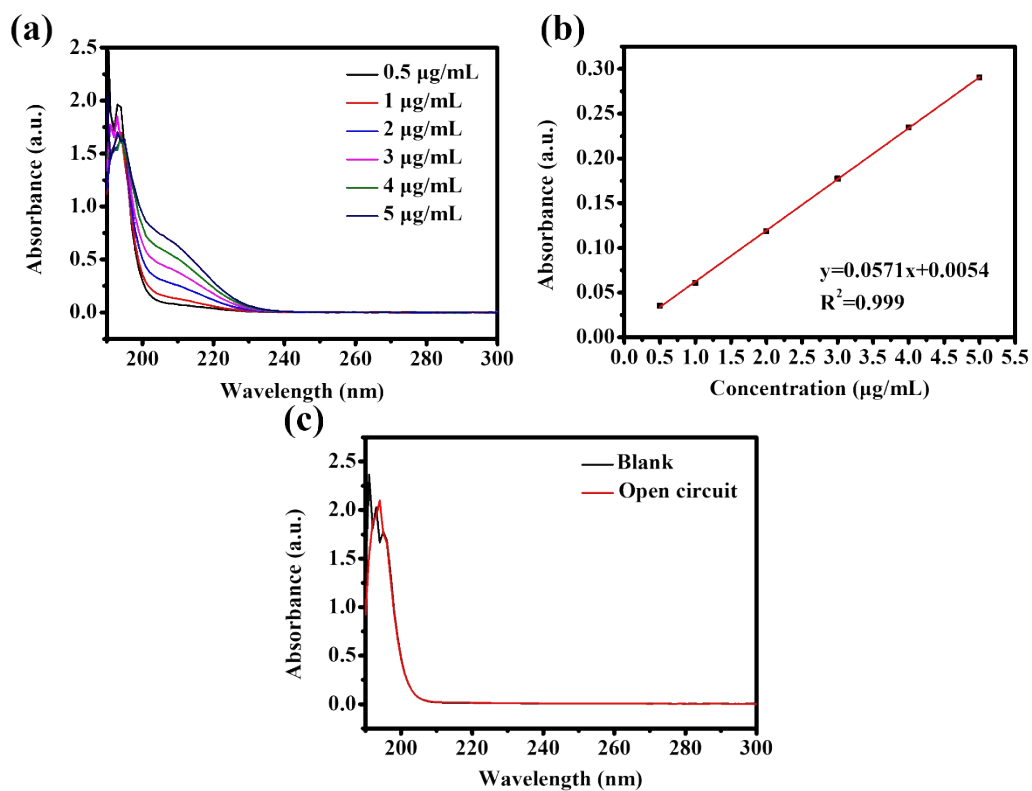

Figure S8. (a) The absorbance of a series of standard solutions for  $\text{NO}_3^-$ , (b) the corresponding fitting curve, (c) UV-vis absorbance of electrolyte for  $\text{NO}_3^-$  detection under different conditions

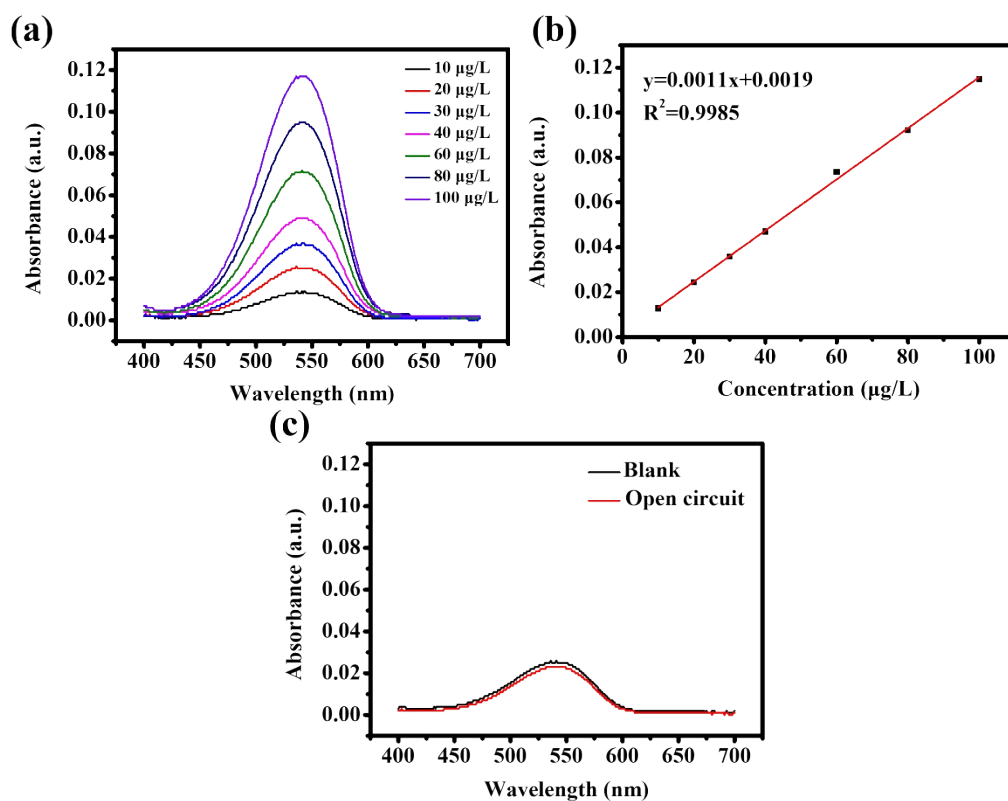

Figure S9. (a) The absorbance of a series of standard solutions for  $\text{NO}_2^-$ , (b) the corresponding fitting curve, (c) UV-vis absorbance of electrolyte for  $\text{NO}_2^-$  detection under different conditions

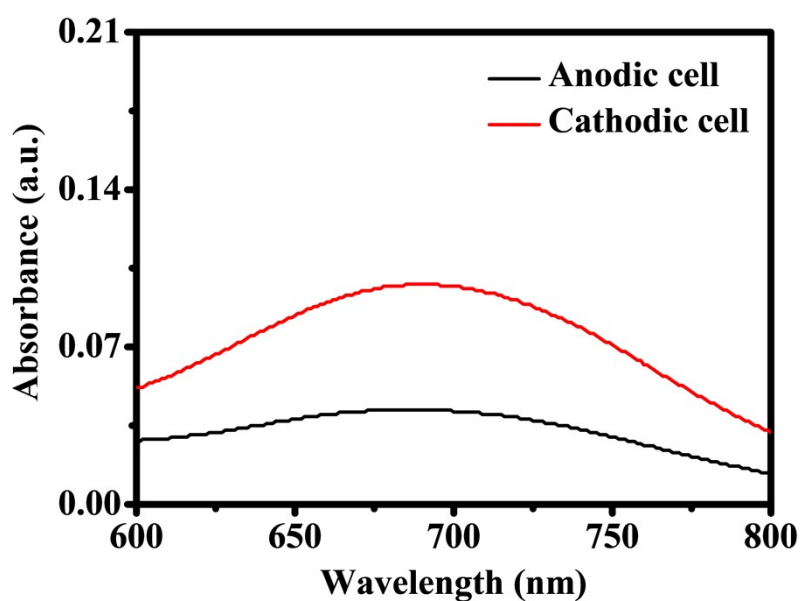

Figure S10. UV-vis absorption spectra of the electrolytes from anodic and cathodic cell

Table S1. The element composition in FeS<sub>2</sub>/MoS<sub>2</sub>(1:1) sample

| Name  | Position | At.%  |
|-------|----------|-------|
| O 1s  | 532.08   | 15.38 |
| C 1s  | 285.08   | 20.17 |
| S 2p  | 163.08   | 45.17 |
| Fe 2p | 708.08   | 1.24  |
| Mo 3d | 229.08   | 18.04 |

Table S2. The comparison of the NRR performance with the relevant Mo-based catalyst

| Catalysts                                         | Conditions                               | NH <sub>3</sub> yield rate                                                                                                                                          | FE (%)       | Ref.             |
|---------------------------------------------------|------------------------------------------|---------------------------------------------------------------------------------------------------------------------------------------------------------------------|--------------|------------------|
| <b>FeS<sub>2</sub>/MoS<sub>2</sub> nanosheets</b> | <b>0.1M Na<sub>2</sub>SO<sub>4</sub></b> | <b>2.59 <math>\mu\text{mol}\cdot\text{h}^{-1}\cdot\text{mg}^{-1}</math><br/>(44.03 <math>\mu\text{g}\cdot\text{h}^{-1}\cdot\text{mg}^{-1}_{\text{cat.}}</math>)</b> | <b>4.63%</b> | <b>This work</b> |
| MoS <sub>2</sub> -rGO                             | 0.1 M LiClO <sub>4</sub>                 | 24.82 $\mu\text{g}\cdot\text{h}^{-1}\cdot\text{mg}^{-1}_{\text{cat.}}$                                                                                              | 4.58%        | 8                |
| MoS <sub>2</sub> -Fe                              | 0.1 M Na <sub>2</sub> SO <sub>4</sub>    | 20.11 $\mu\text{g}\cdot\text{h}^{-1}\cdot\text{mg}^{-1}_{\text{cat.}}$                                                                                              | 15.72%       | 9                |
| VS-MoS <sub>2</sub>                               | 0.1 M Na <sub>2</sub> SO <sub>4</sub>    | 29.55 $\mu\text{g}\cdot\text{h}^{-1}\cdot\text{mg}_{\text{cat.}}^{-1}$                                                                                              | 4.58 %       | 10               |
| Fe-MoS <sub>2</sub>                               | 0.5 M K <sub>2</sub> SO <sub>4</sub>     | 8.63 $\mu\text{g}\cdot\text{h}^{-1}\cdot\text{mg}_{\text{cat.}}^{-1}$                                                                                               | 18.8 %       | 11               |
| Fe <sub>2</sub> (MoO <sub>4</sub> ) <sub>3</sub>  | 0.1 M Na <sub>2</sub> SO <sub>4</sub>    | 7.5 $\mu\text{g}\cdot\text{h}^{-1}\cdot\text{mg}_{\text{cat.}}^{-1}$                                                                                                | 1.0 %        | 12               |
| MoS <sub>2</sub> QDs                              | 0.5 M LiClO <sub>4</sub>                 | 39.6 $\mu\text{g h}^{-1} \text{ mg}^{-1}$                                                                                                                           | 12.9%        | 13               |
| MoS <sub>2</sub> @Fe(OH) <sub>3</sub> /CC         | 0.1 M Na <sub>2</sub> SO <sub>4</sub>    | $4.23 \times 10^{-10} \text{ mol s}^{-1} \text{ cm}^{-2}$                                                                                                           | 2.76%        | 14               |
| FeS <sub>2</sub> -MoS <sub>2</sub>                | 0.1 M KOH                                | $7.1 \times 10^{-4} \mu\text{mol}\cdot\text{s}^{-1}\cdot\text{cm}^{-2}$                                                                                             | 4.6%         | 15               |
| FeS@MoS <sub>2</sub> /CFC                         | Na <sub>2</sub> SO <sub>4</sub>          | 8.45 $\mu\text{g}\cdot\text{h}^{-1}\cdot\text{cm}^{-2}$                                                                                                             | 2.96%        | 16               |
| MoS <sub>2</sub> -800                             | 0.1 M HCl                                | 23.38 $\mu\text{g}\cdot\text{h}^{-1}\cdot\text{mg}^{-1}_{\text{cat.}}$                                                                                              | 17.9%        | 17               |

## References

1. P. L. Searle, *The Analyst*, 1984, **109**, 549.
2. G. W. Watt and J. D. Chrisp, *Analytical Chemistry*, 1954, **26**, 452-453.
3. G. Kresse and J. Furthmüller, *Computational Materials Science*, 1996, **6**, 15-50.
4. G. Kresse and J. Furthmüller, *Physical Review B*, 1996, **54**, 11169-11186.
5. J. P. Perdew, K. Burke and M. Ernzerhof, *Physical review letters*, 1996, **77**, 3865-3868.
6. P. E. Blöchl, *Physical review. B, Condensed matter*, 1994, **50**, 17953-17979.
7. J.-Y. Zhao and J.-M. Zhang, *The Journal of Physical Chemistry C*, 2017, **121**, 19334-19340.
8. X. Li, X. Ren, X. Liu, J. Zhao, X. Sun, Y. Zhang, X. Kuang, T. Yan, Q. Wei and D. Wu, *Journal of Materials Chemistry A*, 2019, **7**, 2524-2528.
9. L. Niu, D. Wang, K. Xu, W. Hao, L. An, Z. Kang and Z. Sun, *Nano Research*, 2021, **14**, 4093-4099.
10. B. Liu, C. Ma, D. Liu and S. Yan, *ChemElectroChem*, 2021, **8**, 3030-3039.
11. H. Su, L. Chen, Y. Chen, R. Si, Y. Wu, X. Wu, Z. Geng, W. Zhang and J. Zeng, *Angew Chem Int Ed Engl*, 2020, **59**, 20411-20416.
12. C. Chen, Y. Liu and Y. Yao, *European Journal of Inorganic Chemistry*, 2020, **2020**, 3236-3241.
13. Y. Luo, P. Shen, X. Li, Y. Guo and K. Chu, *Chem Commun*, 2021, **57**, 9930-9933.
14. X. Xu, X. Liu, J. Zhao, D. Wu, Y. Du, T. Yan, N. Zhang, X. Ren and Q. Wei, *J Colloid Interface Sci*, 2022, **606**, 1374-1379.
15. M. Yang, Z. Jin, C. Wang, X. Cao, X. Wang, H. Ma, H. Pang, L. Tan and G. Yang, *ACS Appl Mater Interfaces*, 2021, **13**, 55040-55050.
16. Y. Guo, Z. Yao, B. J. J. Timmer, X. Sheng, L. Fan, Y. Li, F. Zhang and L. Sun, *Nano Energy*, 2019, **62**, 282-288.
17. M. You, S. Yi, X. Hou, Z. Wang, H. Ji, L. Zhang, Y. Wang, Z. Zhang and D. Chen, *J Colloid Interface Sci*, 2021, **599**, 849-856.
